# Supplementary material for: α-Acylamino-β-lactone N-Acylethanolamine-hydrolyzing Acid Amidase Inhibitors Encapsulated in PLGA Nanoparticles: Improvement of the Physical Stability and Protection of Human Cells from Hydrogen Peroxide-Induced Oxidative Stress
Source: MDPI journal article supplement (doi:10.3390/antiox11040686), 2022-03-31
Supplement: s1 [file s1]

# **$\alpha$ -Acylamino- $\beta$ -lactone N-acylethanolamine-hydrolyzing acid amidase inhibitors encapsulated in PLGA nanoparticles: improvement of the physical stability and protection of human cells from hydrogen peroxide-induced oxidative stress**

Agnese Gagliardi<sup>a</sup>, Roberto Molinaro<sup>b</sup>, Massimo Fresta<sup>a</sup>, Andrea Duranti<sup>c\*</sup>, Donato Cosco<sup>a\*</sup>

<sup>a</sup>Department of Health Sciences, University “Magna Græcia” of Catanzaro, Campus Universitario “S.Venuta”, I-88100 Catanzaro, Italy

<sup>b</sup>IRCCS Ospedale San Raffaele srl, I-20132 Milan, Italy

<sup>c</sup>Department of Biomolecular Sciences, University of Urbino Carlo Bo, Piazza del Rinascimento, 6 61029 Urbino (PU), Italy

## **Supplementary Material**

**Table S1.** Physico-chemical properties of PLGA nanoparticles (2.4 mg/mL) containing URB866.

| URB866 (mg/mL) | Size (nm) | Polydispersity Index | Zeta Potential |
|----------------|-----------|----------------------|----------------|
| -              | 120 ± 1   | 0.08 ± 0.01          | -23 ± 1        |
| 0.1            | 147 ± 1   | 0.06 ± 0.03          | -26 ± 1        |
| 0.2            | 175 ± 1   | 0.09 ± 0.01          | -28 ± 1        |
| 0.4            | 180 ± 2   | 0.16 ± 0.02          | -24 ± 1        |

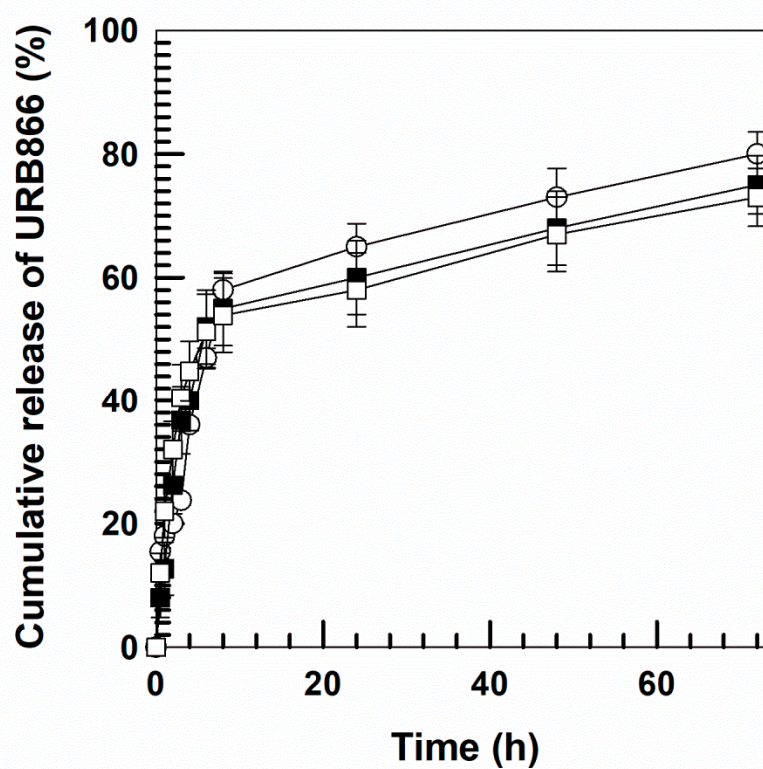

—○— URB866 0.1 mg/mL —■— URB866 0.2 mg/mL —□— URB866 0.4 mg/mL

**Figure S1.** Release profile of URB866 from PLGA nanoparticles as a function of the entrapped drug and incubation time. Values represent the mean of three different experiments  $\pm$  standard deviation.
